# Supplementary material
Source: PubMed Central journal article supplement (PMC2708873)
Supplement: supp_M109.003533_jbc.M109.003533-1.pdf [file supp_M109.003533_jbc.M109.003533-1.pdf]

# The anti-activator ExsD forms a 1:1 complex with ExsA to inhibit transcription of type III secretion operons

Julie Thibault, Eric Faudry, Christine Ebel, Ina Attree, and Sylvie Elsen<sup>‡</sup>

<sup>‡</sup>To whom correspondence should be addressed: LBBSI/iRTSV, Commissariat à l'Energie Atomique Grenoble, 17 rue des Martyrs, 38054 Grenoble cedex 09, France. Tel: 33-438783074; Fax: 33-438784499; E-mail: [sylvie.elsen@cea.fr](mailto:sylvie.elsen@cea.fr).

## SUPPLEMENTARY EXPERIMENTAL PROCEDURES

*Plasmid constructions for heterologous system.* For the construction of the reporter gene plasmid, the promoter of *exsCEBA* operon (*pC*) was amplified by PCR using primers PSE26 and PSE27, cloned into pUC18 cut by *Sma*I and sequenced. The 0.37-kb fragment was released by *Bam*HI and cloned into mini CTX-*lacZ* leading to plasmid pCTX-*pC*<sup>+</sup>*lacZ*. The pRK-*pC*<sup>+</sup>*lacZ* plasmid was constructed by cloning the 4.5-kb *Xba*I-*Hind*III fragment from pCTX-*pC*<sup>+</sup>*lacZ* into pSE102 (see Table S1).

To construct the *exsA* expression vector, the gene was first amplified using primers PSE14 and PSE15, cloned into pUC18 cut by *Sma*I, and sequenced. A fragment of 0.85-kb was excised using *Nde*I-*Bam*HI and cloned into pET-15b, yielding pET15b-HExsA. This plasmid was hydrolyzed with *Nde*I and *Eco*RV, and the fragment of 0.98-kb was inserted into pIApC which was previously cut by *Hind*III, then treated with the Klenow fragment of DNA polymerase I and finally cut by *Nde*I. The resulting plasmid, pPES29, was further cut with *Pvu*II, treated with T4 DNA polymerase and then hydrolyzed by *Xba*I to obtain a 1.2-kb fragment: the fragment was put under the control of the pX<sub>2</sub> promoter in pIApX<sub>2</sub> cut by *Hind*III, treated with Klenow, then *Xba*I. The pX<sub>2</sub>ExsA fragment (2.17-kb fragment obtained by *Pvu*II hydrolysis of pIApX<sub>2</sub>-ExsA) was cloned into pRSFDuet-1 cut by *Pvu*II, that generated the final pRSF-pX<sub>2</sub>ExsA plasmid.

To construct the *exsD* expression vector, the gene was amplified using primers PSE20 and PSE21, cloned onto pUC18 cut by *Sma*I, then sequenced. The gene was hydrolyzed by *Nco*I and *Bam*HI, and the resulting 0.84-kb fragment cloned into the same sites in pET-15b, leading to pPES18. The pIApX<sub>2</sub>ExsD plasmid was constructed by replacing the 0.76-bp *gfp* gene of plasmid pIApX<sub>2</sub> (cut with *Hind*III, treated by Klenow then hydrolyzed with *Xba*I) by the 1.07-kb fragment of pPES18 obtained by *Eco*RV and *Xba*I hydrolysis.

*Construction of overexpression plasmids.* The 0.84-kb DNA fragment encoding full length ExsA was PCR amplified with PSE14 and PSE22 primers. The PCR product was cloned into pUC18 cut with *Sma*I and sequenced. The *Nde*I-*Hind*III fragments was then excised from the plasmid and cloned into pET-22b hydrolysed by *Nde*I/*Hind*III. The resulting pET22b-ExsAH plasmid and the already described pET15b-HExsA plasmid (see above) allow, respectively, the overproduction of the ExsA-His<sub>6</sub> and His<sub>6</sub>-ExsA fusion proteins. Two fragments encoding either the N-terminal domain of ExsA (ExsA<sub>1-168</sub>) or the C-terminal domain of ExsA (ExsA<sub>166-278</sub>) were amplified by PCR using the primers PSE14/PSE43 or PSE34/PSE36, cloned into pCR-Blunt II-TOPO and sequenced. The 0.51-kb and 0.35-kb *Nde*I-*Bam*HI fragments were then cloned into pET-15b. The resulting pET15b-HNter and pET15b-HCter plasmids were used for the overproduction of the His<sub>6</sub>-Nter ExsA and His<sub>6</sub>-Cter ExsA fusion proteins, respectively. The *exsD* gene, amplified using primers PSE20/PSE21 and cloned into pUC18, was further cloned into pACYCDuet-1 plasmid as a *Nco*I/*Bam*HI fragment. The resulting pACYC-ExsD plasmid was used to overproduce the ExsD protein.

**TABLE S1.** Bacterial strains and plasmids used in this work

| Strain or plasmid                                  | Relevant characteristics <sup>a</sup>                                                                                                               | Source or reference      |
|----------------------------------------------------|-----------------------------------------------------------------------------------------------------------------------------------------------------|--------------------------|
| <i>E. coli</i> strains<br>TOP10<br>BL21 Star (DE3) | Chemically competent cells<br><i>F<sup>-</sup> ompT hsdS<sub>B</sub> (r<sub>B</sub><sup>-</sup> m<sub>B</sub><sup>-</sup>) gal dcm rne131</i> (DE3) | Invitrogen<br>Invitrogen |
| Plasmids                                           |                                                                                                                                                     |                          |
| pUC18                                              | Ap <sup>r</sup> ; Cloning vector                                                                                                                    | (1)                      |
| pCR-Blunt II-TOPO                                  | Kn <sup>r</sup> ; Cloning vector                                                                                                                    | Invitrogen               |
| pET-15b                                            | Ap <sup>r</sup> ; Expression vector                                                                                                                 | Novagen                  |
| pET-22b                                            | Ap <sup>r</sup> ; Expression vector                                                                                                                 | Novagen                  |
| pRSFDuet-1                                         | Kn <sup>r</sup> ; Expression vector                                                                                                                 | Novagen                  |
| pACYCDuet                                          | Cm <sup>r</sup> ; Expression vector                                                                                                                 | Novagen                  |
| pSE102                                             | Tc <sup>r</sup> ; broad-host-range pRK290-derived vector                                                                                            | (2)                      |
| pRK- <i>pC<sup>+</sup>-lacZ</i>                    | Tc <sup>r</sup> ; pSE102 containing the <i>pC<sup>+</sup>-lacZ</i> fusion                                                                           | <i>This study</i>        |
| pIApX <sub>2</sub>                                 | Ap <sup>r</sup> ; pUCP20-derived plasmid containing the <i>pX<sub>2</sub>-gfpmut3</i> fusion <sup>b</sup>                                           | I. Attree, unpublished   |
| pIApX <sub>2</sub> ExsD                            | Ap <sup>r</sup> ; pIApX <sub>2</sub> plasmid bearing the <i>pX<sub>2</sub>exsD</i> fusion                                                           | <i>This study</i>        |
| pRSF-pX <sub>2</sub> ExsA                          | Kn <sup>r</sup> ; pRSFDuet-1 containing the <i>pX<sub>2</sub>-exsA</i> fusion                                                                       | <i>This study</i>        |
| pET15b-HExsA                                       | Ap <sup>r</sup> ; Expression vector of <i>his<sub>6</sub>-exsA</i>                                                                                  | <i>This study</i>        |
| pET22b-ExsAH                                       | Ap <sup>r</sup> ; Expression vector of <i>exsA-his<sub>6</sub></i>                                                                                  | <i>This study</i>        |
| pET15b-HNter                                       | Ap <sup>r</sup> ; Expression vector of <i>his<sub>6</sub>Nter-exsA</i>                                                                              | <i>This study</i>        |
| pET15b-HCter                                       | Ap <sup>r</sup> ; Expression vector of <i>his<sub>6</sub>Cter-exsA</i>                                                                              | <i>This study</i>        |
| pET15b-PcrV                                        | Ap <sup>r</sup> ; Expression vector of <i>his<sub>6</sub>pcrV</i>                                                                                   | (3)                      |
| pACYC-ExsD                                         | Ap <sup>r</sup> ; Expression vector of <i>exsD</i>                                                                                                  | <i>This study</i>        |

<sup>a</sup> Ap<sup>r</sup>, Cm<sup>r</sup>, Kn<sup>r</sup>, Tcr<sup>r</sup> indicate resistance to ampicillin, chloramphenicol, gentamycin, kanamycin, and tetracycline, respectively.

<sup>b</sup> pX<sub>2</sub>: T3SS-independent and constitutive promoter isolated from the genome of the *P. aeruginosa* mucoid cystic fibrosis isolate CHA

#### References

1. Yanisch-Perron, C., Vieira, J., and Messing, J. (1985) *Gene* **33**, 103-119
2. Elsen, S., Duché, O., and Colbeau, A. (2003) *J. Bacteriol.* **185**, 7111-7119
3. Schoehn, G., Di Guilmi, A. M., Lemaire, D., Attree, I., Weissenhorn, W., and Dessen A. (2003). *EMBO J.* **22**, 4957-4967.

**TABLE S2.** Oligonucleotides used in this study

| Primer <sup>a</sup> | DNA sequence <sup>b</sup>                                                |
|---------------------|--------------------------------------------------------------------------|
| Cloning             |                                                                          |
| PSE14               | 5' <u>CATATG</u> CAAGGAGCCAAATCTCTTG 3' ( <i>NdeI</i> )                  |
| PSE15               | 5' ACGTCAGTTATTTTTAGCCCGGC 3'                                            |
| PSE20               | 5' <u>CCATGG</u> AGCAGGAAGACGATAAG 3' ( <i>NcoI</i> )                    |
| PSE21               | 5' GCCGCTCAGCTCTGCCAGTAG 3'                                              |
| PSE22               | 5' <u>AAGCTT</u> GTATTTTTAGCCCGGCATTC 3' ( <i>HindIII</i> )              |
| PSE26               | 5' <u>GGATCC</u> AGGTGCGCCAGGGCG 3' ( <i>BamHI</i> )                     |
| PSE27               | 5' <u>GGATCC</u> TGCGAACTCGGCAAGCAG 3' ( <i>BamHI</i> )                  |
| PSE34               | 5' <u>CATATG</u> AGCAACCGGCATGTCGAG 3' ( <i>NdeI</i> )                   |
| PSE36               | 5' <u>GGATCC</u> ACGTCAGTTATTTTTAGCCCG 3' ( <i>BamHI</i> )               |
| PSE43               | 5' <u>GGATCC</u> TCACCGGTTGCTCAGTTGCCG 3' ( <i>BamHI</i> )               |
| EMSA                |                                                                          |
| 5'dR Biot-pC EMSA F | 5'GCGATGTGGCTTTTTTCTTAAAAGAAAAGTCTCTCAGTGACA<br>AAAGCGATGCATAGCCCG 3'    |
| 5'dR Biot-pC EMSA R | 5'CGGGCTATGCATCGCTTTTGTCAGTACTGAGAGACTTTTCTTTTA<br>AGAAAAAAGCCACATCGC 3' |
| SEC                 |                                                                          |
| pC EMSA F           | 5'GCGATGTGGCTTTTTTCTTAAAAGAAAAGTCTCTCAGTGACA<br>AAAGCGATGCATAGCCCG 3'    |
| pC EMSA R           | 5'CGGGCTATGCATCGCTTTTGTCAGTACTGAGAGACTTTTCTTTTA<br>AGAAAAAAGCCACATCGC 3' |

<sup>a</sup>The primers were either used during the cloning steps, the Electrophoretic Mobility Shift Assays (EMSA), or the size exclusion chromatography (SEC) study

<sup>b</sup>Restriction sites incorporated into primers are underlined and indicated in brackets

**Table S3.** Molar masses, partial specific volumes and extinction coefficients of ExsA<sub>H</sub>, <sub>H</sub>ExsA, ExsD and complexes.

|                                                        | A <sub>H</sub> | <sub>H</sub> A | D     | A <sub>H</sub> /D | A <sub>H</sub> /2D | 2A <sub>H</sub> /D | <sub>H</sub> A/D | <sub>H</sub> A/2D | 2 <sub>H</sub> A/D |
|--------------------------------------------------------|----------------|----------------|-------|-------------------|--------------------|--------------------|------------------|-------------------|--------------------|
| <i>M</i> (Da)                                          | 33082          | 33798          | 31372 | 64454             | 95826              | 97536              | 65170            | 96542             | 98968              |
| $\bar{v}$ 20°C (ml g <sup>-1</sup> )                   | 0.740          | 0.737          | 0.731 | 0.735             | 0.734              | 0.737              | 0.734            | 0.733             | 0.735              |
| $\epsilon_{280}$ (cm <sup>-1</sup> M <sup>-1</sup> )   | 34360          | 34360          | 73890 | 108250            | 182140             | 142610             | 108250           | 182140            | 142610             |
| $E_{280,0.1\%}$ (cm <sup>-1</sup> mg <sup>-1</sup> ml) | 1.04           | 1.02           | 2.36  | 1.68              | 1.90               | 1.46               | 1.66             | 1.89              | 1.44               |

*M*: molar mass;  $\bar{v}$ : partial specific volume;  $\epsilon_{280}$ : molar extinction coefficient at 280 nm;  $E_{280,0.1\%}$ : absorbance at 280 nm for 1 mg/ml and 1 cm optical pathlength of A<sub>H</sub>: ExsA<sub>H</sub>; <sub>H</sub>A: <sub>H</sub>ExsA; D: ExsD and complexes. These values were calculated from the aminoacid composition using the program Sednterp ([www.jphilo.mailway.com](http://www.jphilo.mailway.com)).

**Figure S1.** Equilibrium sedimentation of ExsA<sub>H</sub>/ExsD samples at 4°C.

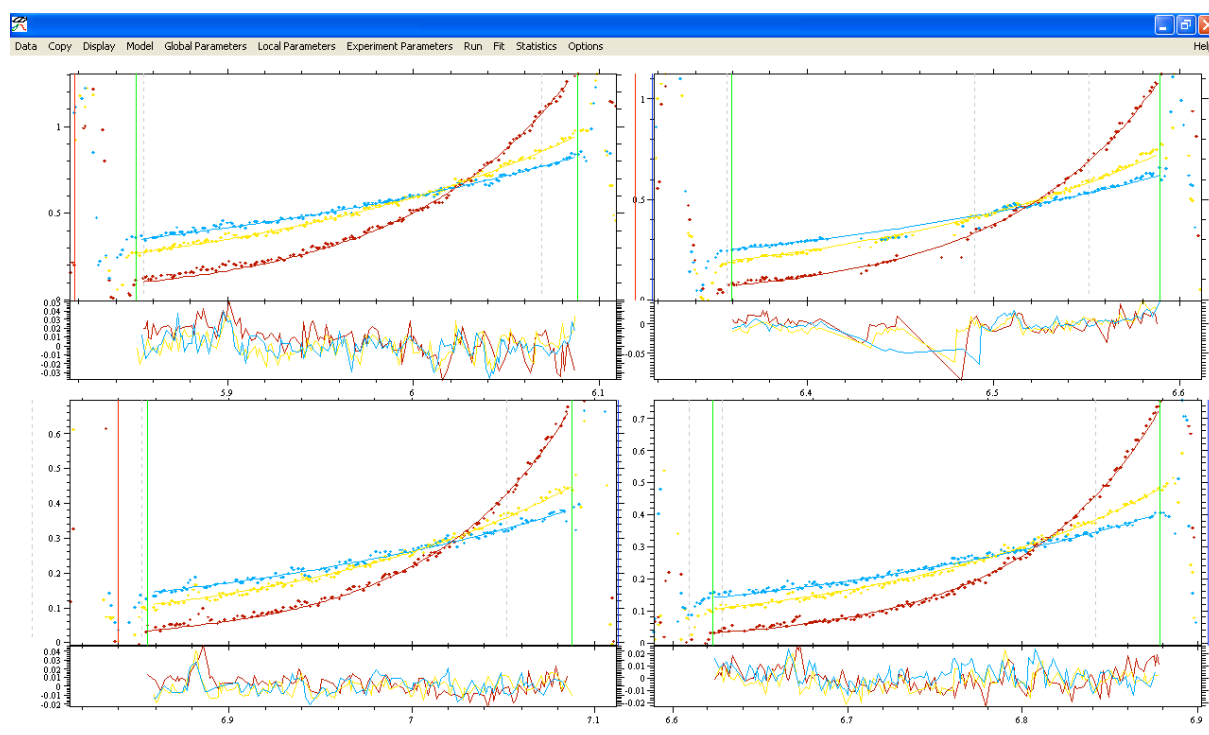

Sedimentation equilibrium profiles were obtained at 8,300 rpm (blue), 10,000 rpm (yellow) and 14,000 rpm (red) for solutions of complex at 0.33, 0.23, 0.14 and 0.58 mg/ml (top left, top right, bottom left and bottom right panels respectively). The first three samples were measured in 6-channel of 1.2 cm optical pathlength and the latter in a 2-channel centrepiece of 0.3 cm optical pathlength. Each panel shows in the top sub-panel the superimposition of the experimental (points) and fitted (curves) data, and in the bottom sub-panel the superimposition of the residuals (differences between the experimental and fitted data). The analysis was made using Sedphat software ([www.analyticalultracentrifugation.com](http://www.analyticalultracentrifugation.com)) considering the raw data, with one same species in all samples, with mass conservation in each sample, leading to a (common) molar mass of 70.2 kDa, calculated with a partial specific volume of 0.73 ml/g and absorbencies of 0.57, 0.40, 0.25 (in the 12 mm optical path-length cells) and 0.25 (in the 3 mm optical path-length cell), with local root mean square deviations of 0.015, 0.016, 0.010 and 0.008 absorbance units (top left, top right, bottom left and bottom right panels respectively).
